# Supplementary material
Source: HighWire-hosted journal article supplement (http://erj.ersjournals.com/highwire/filestream/114446/field_highwire_adjunct_files/0/ERJ-01199-2014_Supplementary_material.pdf)
Supplement: ERJ-01199-2014_Supplementary_material.pdf [file ERJ-01199-2014_Supplementary_material.pdf]

**Table S1 : Characteristics of patients with ALK rearrangements or with discordant IHC/FISH data; response to crizotinib was recorded when available**

| gender | age | centre nb | smoking habit  | stage | treatment         | crizotinib response | % of tumoral cells | nb of tumor cells analysed by FISH | % of positive nuclei | ALK FISH          | Others mutations (EGFR, K-Ras, Her2, PI3KCA, Braf) | ALK qRTPCR | ALK IHC  |
|--------|-----|-----------|----------------|-------|-------------------|---------------------|--------------------|------------------------------------|----------------------|-------------------|----------------------------------------------------|------------|----------|
| F      | 74  | 1         | non-smoker     |       | unknown           |                     | 60                 | 141                                | 63                   | ALK rearrangement | wt                                                 | wt         | positive |
| F      | 65  | 1         | non-smoker     |       | <b>crizotinib</b> | response            |                    | 100                                | 75                   | ALK rearrangement | wt                                                 | wt         | positive |
| F      | 81  | 1         | non-smoker     |       | no crizotinib     |                     | 90                 | 100                                | 85                   | ALK rearrangement | wt                                                 | variant 2  | positive |
| F      | 17  | 1         | non-smoker     |       | <b>crizotinib</b> | partial response    | 30                 | 100                                | 45                   | ALK rearrangement | wt                                                 | variant 1  | positive |
| F      | 65  | 1         | unknown        |       | no crizotinib     | dead                | 62                 | 61                                 | 65                   | ALK rearrangement | wt                                                 | wt         | positive |
| M      | 63  | 1         | non-smoker     |       | <b>crizotinib</b> | response            | 30                 | 103                                | 66                   | ALK rearrangement | wt                                                 | wt         | positive |
| F      | 69  | 1         | non-smoker     |       | no crizotinib     |                     | 34                 | 96                                 | 37                   | ALK rearrangement | wt                                                 | variant 3a | positive |
| M      | 51  | 1         | current smoker |       | <b>crizotinib</b> | response            | 45                 | 97                                 | 65                   | ALK rearrangement | wt                                                 | variant 3a | positive |
| F      | 58  | 1         | non-smoker     |       | <b>crizotinib</b> | response            | 40                 | 101                                | 73                   | ALK rearrangement | wt                                                 | wt         | positive |
| F      | 63  | 1         | non-smoker     |       | <b>crizotinib</b> | response            | 80                 | 104                                | 91                   | ALK rearrangement | wt                                                 | wt         | positive |
| M      | 59  | 3         | light-smoker   | IIB   | no crizotinib     |                     | 50                 | 64                                 | 64                   | ALK rearrangement | wt                                                 | NI         | positive |
| F      | 63  | 3         | unknown        |       | <b>crizotinib</b> | response            | 50                 | 135                                | 54                   | ALK rearrangement | wt                                                 | variant 1  | positive |
| M      | 65  | 3         | non-smoker     | IB    | no crizotinib     |                     | 70                 | 186                                | 28                   | ALK rearrangement | wt                                                 | wt         | positive |
| M      | 66  | 3         | light-smoker   | IV    | <b>crizotinib</b> | response            | 20                 | 157                                | 75                   | ALK rearrangement | wt                                                 | NI         | positive |
| M      | 46  | 3         | non-smoker     | IV    | no crizotinib     |                     | 70                 | 154                                | 21                   | ALK rearrangement | wt                                                 | variant 1  | positive |
| F      | 72  | 3         | non-smoker     | IIIA  | no crizotinib     |                     | 70                 | 109                                | 77                   | ALK rearrangement | wt                                                 | NI         | positive |
| M      | 71  | 3         | light-smoker   | IV    | <b>crizotinib</b> | response            | 70                 | 115                                | 60                   | ALK rearrangement | wt                                                 |            | positive |

|   |    |   |                |      |                   |          |     |     |    |                   |         |               |          |
|---|----|---|----------------|------|-------------------|----------|-----|-----|----|-------------------|---------|---------------|----------|
| F | 62 | 3 | non-smoker     | IV   | <b>crizotinib</b> | response | 50  | 147 | 65 | ALK rearrangement | wt      | variant 3a    | positive |
| F | 53 | 3 | non-smoker     | IIIB | <b>crizotinib</b> | unknown  | 50  | 70  | 98 | ALK rearrangement | wt      |               | positive |
| M | 48 | 3 | non-smoker     | IV   | <b>crizotinib</b> | response | 80  | 137 | 93 | ALK rearrangement | wt      | variant 3a    | positive |
| F | 61 | 3 | non-smoker     | IV   | <b>crizotinib</b> | response | 50  | 124 | 79 | ALK rearrangement | wt      | variant 3a    | positive |
| F | 49 | 5 | unknown        |      | unknown           |          | 90  | 60  | 68 | ALK rearrangement | unknown | variant 5, 3a | positive |
| F | 31 | 5 | Inconnu        | IA   | unknown           |          | 90  | 60  | 36 | ALK rearrangement | unknown | variant 2     | positive |
| F | 54 | 5 | current smoker | IA   | unknown           |          | 70  | 60  | 38 | ALK rearrangement | unknown | variant 2     | positive |
| F | 49 | 5 | current smoker | IIA  | <b>crizotinib</b> | response | 60  | 60  | 38 | ALK rearrangement | unknown | wt            | positive |
| M | 33 | 6 | light-smoker   |      | <b>crizotinib</b> | response | 50  | 100 | 60 | ALK rearrangement | unknown | variant 3a    | positive |
| M | 64 | 6 | smoker         |      | no crizotinib     |          | 70  | 100 | 40 | ALK rearrangement | unknown | variant 1     | positive |
| M | 67 | 6 | former smoker  |      | no crizotinib     |          | 40  | 100 | 60 | ALK rearrangement | unknown | wt            | positive |
| M | 58 | 6 | non-smoker     |      | unknown           |          | 60  | 100 | 80 | ALK rearrangement | unknown |               | positive |
| M | 74 | 6 | unknown        |      | no crizotinib     |          | 50  | 100 | 70 | ALK rearrangement | unknown |               | positive |
| F | 65 | 6 | unknown        |      | no crizotinib     |          | 60  | 100 | 50 | ALK rearrangement | unknown |               | positive |
| F | 68 | 6 | non-smoker     |      | unknown           |          | 100 | 100 | 80 | ALK rearrangement | unknown | variant 1     | positive |
| M | 49 | 6 | current smoker |      | no crizotinib     |          | 20  | 100 | 40 | ALK rearrangement | unknown | NI            | positive |
| F | 34 | 6 | unknown        |      | <b>crizotinib</b> | response |     | 100 | 60 | ALK rearrangement | unknown | variant 2     | positive |
| M | 44 | 6 | current smoker | IV   | <b>crizotinib</b> | response | 45  | 100 | 90 | ALK rearrangement | unknown | wt            | positive |
| F | 49 | 6 | light-smoker   |      | <b>crizotinib</b> | response | 30  | 100 | 40 | ALK rearrangement | unknown | variant 1     | positive |
| M | 73 | 6 | former smoker  |      | unknown           |          | 80  | 100 | 80 | ALK rearrangement | unknown | variant 1     | positive |

|   |    |   |                |      |                   |          |    |     |     |                   |         |              |          |
|---|----|---|----------------|------|-------------------|----------|----|-----|-----|-------------------|---------|--------------|----------|
| F | 66 | 6 | non-smoker     |      | no crizotinib     |          | 60 | 100 | 60  | ALK rearrangement | unknown |              | positive |
| M | 65 | 6 | former smoker  |      | unknown           |          | 50 | 100 | 80  | ALK rearrangement | unknown | wt           | positive |
| F | 44 | 2 | non-smoker     | IIIA | no crizotinib     | chemo    | 40 | 70  | 31  | ALK rearrangement | wt      | wt           | positive |
| F | 73 | 2 | non-smoker     | IIIA | no crizotinib     | chemo    | 80 | 80  | 93  | ALK rearrangement | wt      | variant 3a   | positive |
| F | 54 | 2 | non-smoker     | IIIB | <b>crizotinib</b> | stable   | 70 | 78  | 100 | ALK rearrangement | wt      | wt           | positive |
| M | 57 | 2 | current smoker | IV   | <b>crizotinib</b> | response | 50 | 81  | 59  | ALK rearrangement | wt      | variant 3a   | positive |
| M | 42 | 2 | current smoker | IV   | no crizotinib     | chemo    | 20 | 68  | 70  | ALK rearrangement | wt      | wt           | positive |
| F | 74 | 2 | non-smoker     | IIIA | unknown           |          | 50 | 84  | 33  | ALK rearrangement | wt      | variant 1    | positive |
| F | 66 | 2 | non-smoker     |      | <b>crizotinib</b> | response | 70 | 84  | 61  | ALK rearrangement | wt      | variant 5, 7 | positive |
| M | 67 | 2 | non-smoker     | IB   | no crizotinib     | dead     | 60 | 60  | 53  | ALK rearrangement | wt      | variant 2    | positive |
| M | 41 | 4 | non-smoker     | IV   | no crizotinib     |          | 30 | 50  | 96  | ALK rearrangement | wt      | wt           | positive |
| M | 74 | 4 | light-smoker   | IIA  | no crizotinib     |          | 50 | 101 | 55  | ALK rearrangement | wt      | wt           | positive |
| F | 58 | 4 | non-smoker     | IV   | no crizotinib     |          | 50 | 60  | 51  | ALK rearrangement | wt      | variant 1    | positive |
| F | 40 | 4 | non-smoker     | IA   | no crizotinib     |          | 80 | 92  | 38  | ALK rearrangement | wt      | variant 3a   | positive |
| M | 54 | 4 | non-smoker     | IV   | no crizotinib     |          | 40 | 215 | 68  | ALK rearrangement | wt      | variant 1, 2 | positive |
| F | 41 | 4 | non-smoker     | IV   | no crizotinib     |          | 30 | 163 | 68  | ALK rearrangement | wt      | variant 2    | positive |
| M | 81 | 4 | non-smoker     | IIA  | no crizotinib     |          | 30 | 69  | 50  | ALK rearrangement | wt      | variant 1    | positive |
| M | 72 | 4 | non-smoker     | IV   | no crizotinib     |          | 30 | 50  | 80  | ALK rearrangement | wt      | wt           | positive |
| F | 67 | 4 | non-smoker     | IA   | no crizotinib     |          | 50 | 50  | 66  | ALK rearrangement | wt      | wt           | positive |
| M | 70 | 4 | non-smoker     | IV   | no crizotinib     |          | 40 | 50  | 24  | ALK rearrangement | wt      |              | positive |

|   |    |    |                |      |                   |          |     |     |    |                   |         |            |          |
|---|----|----|----------------|------|-------------------|----------|-----|-----|----|-------------------|---------|------------|----------|
| F | 76 | 4  | non-smoker     | IV   | no crizotinib     |          | 80  | 112 | 50 | ALK rearrangement | wt      | variant 1  | positive |
| F | 64 | 4  | current smoker | IA   | no crizotinib     |          | 60  | 50  | 70 | ALK rearrangement | wt      | variant 3a | positive |
| F | 39 | 4  | non-smoker     | IV   | no crizotinib     |          | 30  | 50  | 86 | ALK rearrangement | wt      | variant 3a | positive |
| F | 79 | 9  | non-smoker     | IB   | unknown           |          | 80  | 196 | 29 | ALK rearrangement | unknown | NI         | positive |
| M | 69 | 9  | non-smoker     | IV   | <b>crizotinib</b> |          | 20  | 88  | 21 | ALK rearrangement | wt      | variant 1  | positive |
| F | 78 | 9  | non-smoker     | IV   | no crizotinib     | dead     | 70  | 91  | 27 | ALK rearrangement | unknown | variant 3a | positive |
| M | 58 | 9  | current smoker | IA   | no crizotinib     |          | 100 | 134 | 44 | ALK rearrangement | unknown | wt         | positive |
| F | 61 | 9  | former smoker  | IA   | <b>crizotinib</b> |          | 80  | 139 | 49 | ALK rearrangement | unknown |            | positive |
| M | 52 | 12 | current smoker | IA   |                   |          | 50  | 60  | 93 | ALK rearrangement | wt      | variant 1  | positive |
| F | 49 | 12 | unknown        | IA   |                   |          | 60  | 50  | 90 | <b>Polysomy</b>   | wt      | variant 1  | positive |
| F | 86 | 11 | unknown        | IV   | unknown           |          | 60  | 50  | 56 | ALK rearrangement | wt      | variant 3a | positive |
| F | 53 | 11 | unknown        | IV   | unknown           |          | 80  | 50  | 62 | ALK rearrangement | wt      | variant 3a | positive |
| F | 64 | 11 | non-smoker     | IV   | no crizotinib     | chemo    | 50  | 50  | 74 | ALK rearrangement | wt      |            | positive |
| M | 34 | 11 | non-smoker     | IV   | <b>crizotinib</b> | response | 70  | 30  | 89 | ALK rearrangement | wt      | variant 1  | positive |
| F | 50 | 11 | non-smoker     | IV   | no crizotinib     | dead     | 80  | 75  | 74 | ALK rearrangement | wt      | variant 1  | positive |
| F | 66 | 11 | non-smoker     | IV   | <b>crizotinib</b> | response | 70  | 50  | 84 | ALK rearrangement | wt      | variant 1  | positive |
| F | 73 | 11 | non-smoker     | IIIB | no crizotinib     | chemo    | 90  | 50  | 80 | ALK rearrangement | wt      | variant 3a | positive |
| F | 43 | 11 | non-smoker     | IV   | <b>crizotinib</b> | response | 30  | 50  | 94 | ALK rearrangement | wt      |            | positive |
| F | 69 | 11 | non-smoker     | IV   | unknown           |          | 40  | 50  | 86 | ALK rearrangement | wt      | variant 1  | positive |
| M | 45 | 11 | unknown        | IVA  | no crizotinib     | chemo    | 50  | 58  | 58 | ALK rearrangement | wt      | variant 1  | positive |
| F | 62 | 11 | non-smoker     | IV   | no crizotinib     | chemo    | 50  | 50  | 64 | ALK               | wt      |            | positive |

| Sex | Age | Smoking | Stage          | Treatment | Response          | OS (%)   | OS (%) | OS (%) | Genotype | Variant       | Outcome |            |          |
|-----|-----|---------|----------------|-----------|-------------------|----------|--------|--------|----------|---------------|---------|------------|----------|
| F   | 74  | 11      | non-smoker     | IV        | <b>crizotinib</b> | response | 20     | 50     | 46       | rearrangement | wt      | variant 2  | positive |
| F   | 73  | 11      | non-smoker     | IIIA      | no crizotinib     | dead     | 50     | 50     | 96       | rearrangement | wt      |            | positive |
| M   | 56  | 10      | former smoker  | IIA       | unknown           |          | 80     | 100    | 70       | rearrangement | wt      | wt         | positive |
| F   | 58  | 10      | unknown        | IIB       | unknown           |          | 70     | 100    | 60       | rearrangement | wt      | variant 5  | positive |
| F   | 40  | 10      | unknown        |           | <b>crizotinib</b> | response | 30     | 100    | 70       | rearrangement | wt      | wt         | positive |
| M   | 41  | 10      | unknown        | IIB       | unknown           |          | 90     | 100    | 80       | rearrangement | wt      | variant 1  | positive |
| F   | 40  | 10      | unknown        |           | unknown           |          | 30     | 100    | 70       | rearrangement | wt      |            | positive |
| M   | 40  | 10      | unknown        | IVB       | <b>crizotinib</b> | response | 80     | 100    | 40       | rearrangement | wt      | wt         | positive |
| F   | 71  | 10      | unknown        | IV        | unknown           |          | 70     | 100    | 50       | rearrangement | wt      | wt         | positive |
| M   | 72  | 10      | unknown        | IV        | unknown           |          | 30     | 100    | 35       | rearrangement | wt      | variant 1  | positive |
| M   | 80  | 10      | unknown        | IIIB      | unknown           |          | 70     | 100    | 55       | rearrangement | wt      | variant 1  | positive |
| F   | 56  | 10      | current smoker | IIA       | unknown           |          | 60     | 100    | 40       | rearrangement | wt      |            | positive |
| F   | 49  | 10      | light-smoker   | IA        | unknown           |          | 70     | 100    | 60       | rearrangement | wt      | variant 1  | positive |
| F   | 57  | 10      | former smoker  | IIA       | unknown           |          | 70     | 100    | 90       | rearrangement | wt      | variant 3a | positive |
| F   | 35  | 10      | light-smoker   | IV        | <b>crizotinib</b> | response | 80     | 100    | 40       | rearrangement | wt      | wt         | positive |
| F   | 67  | 10      | unknown        | IV        | unknown           |          | 75     | 100    | 60       | rearrangement | wt      | variant 3a | positive |
| F   | 62  | 10      | current smoker | IIB       | <b>crizotinib</b> | response | 90     | 100    | 80       | rearrangement | wt      | variant 3a | positive |
| M   | 54  | 10      | unknown        | IV        | unknown           |          | 60     | 100    | 60       | rearrangement | wt      | variant 3a | positive |
| F   | 69  | 10      | unknown        | IIIA      | unknown           |          | 20     | 100    | 50       | rearrangement | wt      | variant 3a | positive |
| M   | 69  | 10      | current smoker | IB        | unknown           |          | 80     | 100    | 70       | ALK           | wt      | wt         | positive |

|   |    |    |                |      |                   |          |     |     |     |                   |         |            |          |
|---|----|----|----------------|------|-------------------|----------|-----|-----|-----|-------------------|---------|------------|----------|
|   |    |    |                |      |                   |          |     |     |     | rearrangement     |         |            |          |
| M | 67 | 13 | non-smoker     | IV   | no crizotinib     |          | 30  | 100 | 74  | ALK rearrangement | wt      | variant 1  | positive |
| M | 58 | 13 | current smoker | IV   | no crizotinib     |          | 70  | 123 | 36  | ALK rearrangement | wt      | variant 1  | positive |
| F | 49 | 13 | light-smoker   | IIIA | no crizotinib     |          | 80  | 100 | 82  | ALK rearrangement | wt      | variant 3a | positive |
| F | 82 | 13 | non-smoker     | IV   | no crizotinib     |          | 20  | 100 | 25  | ALK rearrangement | wt      | variant 3a | positive |
| M | 71 | 13 | current smoker | IIIA | no crizotinib     |          | 70  | 100 | 57  | ALK rearrangement | wt      | variant 1  | positive |
| M | 34 | 13 | non-smoker     | IV   | no crizotinib     |          | 50  | 195 | 28  | ALK rearrangement | wt      | variant 3a | positive |
| F | 53 | 13 | non-smoker     | IIIA | no crizotinib     |          | 80  | 100 | 85  | ALK rearrangement | wt      | variant 1  | positive |
| F | 48 | 13 | non-smoker     | IIIA | no crizotinib     |          | 80  | 100 | 64  | ALK rearrangement | wt      | variant 2  | positive |
| M | 74 | 13 | non-smoker     | IIIA | no crizotinib     |          | 70  | 40  | 100 | ALK rearrangement | wt      | variant 3a | positive |
| F | 65 | 13 | non-smoker     | IV   | no crizotinib     |          | 60  | 100 | 85  | ALK rearrangement | wt      | wt         | positive |
| F | 69 | 13 | non-smoker     | IIIA | no crizotinib     |          | 80  | 17  | 100 | ALK rearrangement | wt      | wt         | positive |
| M | 30 | 7  | light-smoker   | IIIA | <b>crizotinib</b> | response | 70  | 60  | 86  | ALK rearrangement | unknown | wt         | positive |
| F | 44 | 7  | non-smoker     | IIA  | <b>crizotinib</b> | response |     | 60  | 96  | ALK rearrangement | unknown | wt         | positive |
| M | 47 | 7  | non-smoker     | IV   | <b>crizotinib</b> | response | 30  | 60  | 66  | ALK rearrangement | unknown | wt         | positive |
| F | 47 | 7  | unknown        | IIA  | unknown           |          | 90  | 60  | 91  | ALK rearrangement | unknown | wt         | positive |
| F | 67 | 7  | current smoker | IIIA | unknown           |          | 100 | 60  | 89  | ALK rearrangement | unknown | variant 3a | positive |
| M | 70 | 7  | light-smoker   | IV   | <b>crizotinib</b> | response | 60  | 60  | 44  | ALK rearrangement | unknown | variant 3a | positive |
| F | 55 | 7  | unknown        |      | unknown           |          | 90  | 60  | 81  | ALK rearrangement | unknown | wt         | positive |
| M | 52 | 7  | non-smoker     | IIIA | no crizotinib     | surgery  | 90  | 60  | 70  | ALK rearrangement | unknown | wt         | positive |
| M | 56 | 10 | former smoker  | IIA  | unknown           |          | 80  | 100 | 70  | ALK               | unknown | wt         | positive |

|   |    |    |                |      |                   |          |    |     |    |                                       |         |           |                 |
|---|----|----|----------------|------|-------------------|----------|----|-----|----|---------------------------------------|---------|-----------|-----------------|
| F | 79 | 9  | non-smoker     | IB   | unknown           |          | 80 | 196 | 29 | rearrangement<br>ALK<br>rearrangement | unknown | NI        | positive        |
| F | 56 | 7  | non-smoker     | IV   | <b>crizotinib</b> | response | 40 | 60  | 85 | rearrangement                         | unknown | wt        | positive        |
| F | 47 | 11 | current smoker | IV   | unknown           |          | 40 | 75  | 10 | no ALK<br>rearrangement               | unknown | wt        | <b>positive</b> |
| M | 57 | 11 | current smoker | IV   | unknown           |          | 90 | 50  | 10 | no ALK<br>rearrangement               | unknown | wt        | <b>positive</b> |
| F | 83 | 1  | non-smoker     |      | unknown           |          | 30 | 100 | 10 | no ALK<br>rearrangement               | wt      | wt        | negative        |
| M | 74 | 10 | unknown        | IIIA | unknown           |          | 70 | 100 | 10 | no ALK<br>rearrangement               | unknown | NI        | negative        |
| M | 62 | 11 | current smoker | IVA  | unknown           |          | 80 | 100 | 10 | <b>Polysomy</b><br>no ALK             | unknown | wt        | <b>positive</b> |
| F | 61 | 6  | unknown        |      | unknown           |          | 60 | 100 | 10 | rearrangement<br>no ALK               | unknown | variant 1 | <b>positive</b> |
| M | 77 | 10 | unknown        | IVA  | unknown           |          | 80 | 80  | 12 | rearrangement<br>no ALK               | unknown | wt        | <b>positive</b> |
| M | 86 | 13 | light-smoker   | IA   | unknown           |          | 90 | 100 | 12 | rearrangement<br>no ALK               | K ras   | wt        | <b>positive</b> |
| M | 57 | 1  | former smoker  |      | unknown           |          | 35 | 100 | 13 | rearrangement<br>no ALK               | unknown | wt        | <b>positive</b> |
| M | 76 | 7  | current smoker | IIIA | unknown           |          | 80 | 60  | 13 | rearrangement<br>no ALK               | unknown | wt        | negative        |
| F | 70 | 2  | non-smoker     | IIIB | unknown           |          | 80 | 97  | 14 | rearrangement<br>no ALK               | wt      |           | <b>positive</b> |
| M | 69 | 10 | unknown        |      | unknown           |          | 80 | 62  | 14 | rearrangement                         | unknown | wt        | negative        |
| F | 65 | 10 | former smoker  | IVA  | unknown           |          | 80 | 62  | 16 | ALK<br>rearrangement                  | unknown | wt        | positive        |
| M | 63 | 10 | unknown        | IV   | unknown           |          | 80 | 61  | 16 | ALK<br>rearrangement                  | unknown | wt        | <b>negative</b> |
| M | 59 | 10 | unknown        |      | unknown           |          | 80 | 60  | 17 | ALK<br>rearrangement                  | unknown | wt        | <b>negative</b> |
| F | 52 | 10 | unknown        | IIA  | unknown           |          | 70 | 60  | 18 | ALK<br>rearrangement                  | unknown | wt        | <b>negative</b> |
| F | 62 | 4  | current smoker | IV   | no crizotinib     |          | 70 | 50  | 18 | ALK<br>rearrangement                  | unknown | wt        | positive        |
| M | 54 | 4  | non-smoker     | IV   | no crizotinib     |          | 50 | 50  | 18 | ALK<br>rearrangement                  | unknown | wt        | <b>negative</b> |

|   |    |    |                |      |                   |          |    |     |    |                   |              |           |                 |
|---|----|----|----------------|------|-------------------|----------|----|-----|----|-------------------|--------------|-----------|-----------------|
| F | 65 | 10 | unknown        |      | unknown           |          | 70 | 63  | 19 | ALK rearrangement | unknown      | wt        | positive        |
| M | 54 | 9  | non-smoker     | IV   | no crizotinib     | chemo    | 70 | 217 | 19 | ALK rearrangement | unknown      | variant 1 | positive        |
| M | 53 | 6  | current smoker |      | <b>crizotinib</b> | response | 80 | 100 | 20 | ALK rearrangement | unknown      |           | positive        |
| F | 50 | 12 | current smoker | IIIA | unknown           |          | 10 | 111 | 19 | ALK rearrangement | <b>K ras</b> | wt        | positive        |
| F | 80 | 10 | unknown        | IIIA | unknown           |          | 70 | 100 | 20 | ALK rearrangement | unknown      |           | positive        |
| M | 65 | 10 | unknown        | IIB  | unknown           |          | 70 | 100 | 20 | ALK rearrangement | <b>wt</b>    | wt        | <b>negative</b> |
| M | 62 | 10 | unknown        | IV   | unknown           |          | 30 | 60  | 20 | ALK rearrangement | unknown      | wt        | <b>negative</b> |
| M | 65 | 6  | current smoker |      | unknown           |          | 95 | 100 | 30 | ALK rearrangement | unknown      |           | <b>negative</b> |
| M | 64 | 10 | unknown        | IVA  | unknown           |          | 60 | 59  | 22 | ALK rearrangement | unknown      | wt        | <b>negative</b> |
| M | 72 | 10 | former smoker  | IB   | unknown           |          | 80 | 100 | 40 | ALK rearrangement | unknown      | wt        | <b>negative</b> |
| M | 56 | 13 | former smoker  | IIIA | unknown           |          | 20 | 100 | 54 | ALK rearrangement | wt           | wt        | <b>negative</b> |
| M | 53 | 10 | unknown        | IV   | unknown           |          | 25 | 100 | 60 | ALK rearrangement | unknown      | wt        | <b>negative</b> |
| M | 82 | 6  | current smoker |      | unknown           |          | 75 | 100 | 70 | ALK rearrangement | unknown      | variant 1 | <b>negative</b> |
| M | 66 | 11 | unknown        |      | unknown           |          | 70 | 50  | 92 | ALK rearrangement | unknown      | variant 1 | <b>negative</b> |
| M | 78 | 1  | former smoker  |      | unknown           |          | 81 | 0   | NA | non interpretable | K ras        | wt        | negative        |
| F | 59 | 3  | current smoker | IV   | unknown           |          | 30 | 0   | NA | non interpretable | unknown      | wt        | negative        |
| F | 87 | 3  | non-smoker     | IIIA | unknown           |          | 20 | 0   | NA | non interpretable | unknown      | wt        | negative        |
| F | 77 | 3  | non-smoker     | IIIA | unknown           |          | 70 | 0   | NA | non interpretable | unknown      | wt        | negative        |
| M | 60 | 3  | unknown        | IA   | unknown           |          | 10 | 0   | NA | non interpretable | unknown      | wt        | negative        |
| M | 66 | 10 | unknown        | IV   | unknown           |          | 50 | 0   | NA | non interpretable | unknown      | variant 1 | positive        |
| F | 64 | 5  | unknown        |      | <b>crizotinib</b> | response | 40 | 0   | NA | non interpretable | unknown      | variant 2 | positive        |
